# Supplementary material for: Phenylbutyrate Ameliorates High-Fat Diet-Induced Obesity via Brown Adipose Tissue Activation
Source: Preprints.org preprint supplement (doi:10.20944/preprints201901.0073.v1), 2019-01-08
Supplement: Supplementary file 1 [file supplementary]

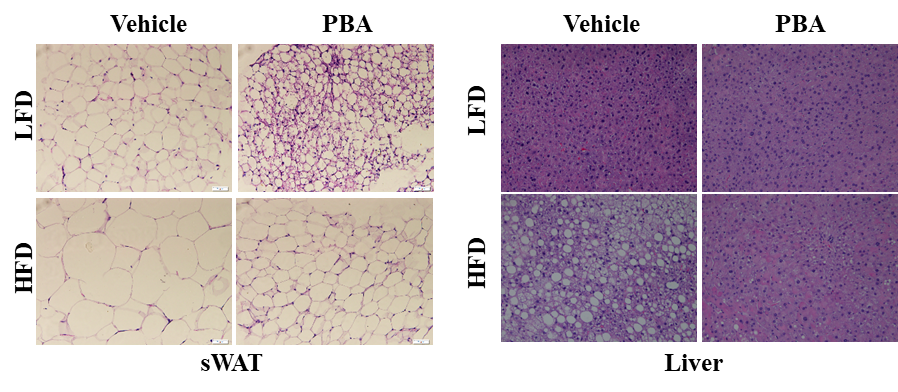


**Figure 1.** **Supplementary Figure S1.** PBA suppresses HFD-induced fat accumulation in sWAT and liver. Tissue sections of sWAT and liver from mice fed LFD or HFD for 24 weeks with or without PBA treatment were subjected to hematoxylin and eosin (H&E) staining. Representative pictures are presented. Magnification: X 400.
